# Supplementary material
Source: publisher figshare collection journal article supplement (https://acs.figshare.com/ndownloader/files/7284119)
Supplement: Supplementary file 1 [file 7284119]

**Supporting Information for**

**Covalent Stabilization of Inverse Bicontinuous Cubic Structures of Block Copolymer**

**Bilayers by Photodimerization of Indene Pendant Groups of Polystyrene Hydrophobic**

**Blocks**

*Moon Gon Jeong<sup>†</sup> and Kyoung Taek Kim<sup>§,\*</sup>*

<sup>†</sup>Department of Chemistry, Ulsan National Institute of Science and Technology (UNIST), 50 UNIST Road, Ulsan 689-798, Korea

<sup>§</sup>Department of Chemistry, Seoul National University, Seoul 151-747, Korea.

\*Correspondence to: [ktkim72@snu.ac.kr](mailto:ktkim72@snu.ac.kr)

CONTENTS

|                                                                                                                                                                                         |     |
|-----------------------------------------------------------------------------------------------------------------------------------------------------------------------------------------|-----|
| 1. A coincidence of the composition ratio of 1-TMS and styrene to the feed ratio                                                                                                        | S-2 |
| 2. GPC analysis of P1-TMS, P2-TMS, P1 and P2                                                                                                                                            | S-3 |
| 3. Cross-linking of film of P1                                                                                                                                                          | S-4 |
| 4. Short-wavelength UV light ( $\lambda = 254$ nm) exposure to cross-linked P1 solution & demonstration of [2 + 2]-cycloaddition and retro-cyclization of indenylstyrene model compound | S-5 |
| 5. A coincidence of the composition ratio of indenylstyrene in the hydrophobic block and stability of the self-assembled structures                                                     | S-7 |
| 6. Short-wavelength UV light ( $\lambda = 254$ nm) exposure to cross-linked vesicles of P4                                                                                              | S-9 |
| 7. Reference                                                                                                                                                                            | S-9 |

1. A coincidence of the composition ratio of 1-TMS and styrene to the feed ratio

- Feed ratio

[Initiator]: [1-TMS]: [Styrene] = 1: 72 (30%): 168 (70%)

- $DP_n$  ratio

1-TMS: Styrene = 46 (34%): 91 (66%)

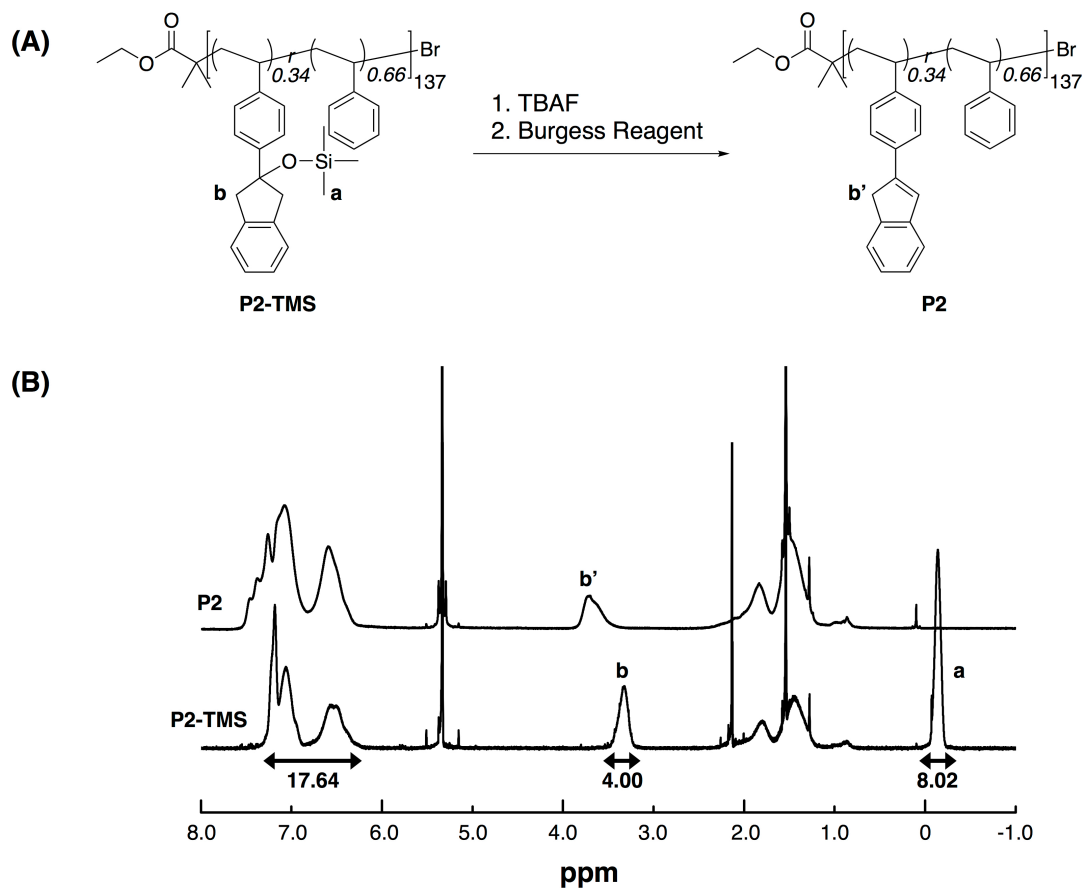

**Figure S1.** (A) A scheme for post-modification of **P2-TMS** to **P2**. (B)  $^1\text{H}$  NMR spectra of **P2-TMS** and **P2**. The  $DP_n$  ratio was calculated based on the **P2-TMS** spectrum.

## 2. GPC analysis of P1-TMS, P2-TMS, P1 and P2

**Table S1.** Molecular weight ( $M_n$ ) and polydispersity index ( $\mathcal{D}$ ) of **P1-TMS**, **P2-TMS**, **P1** and **P2**

| Sample        | $M_n$ (kg mol <sup>-1</sup> ) | $\mathcal{D}$ |
|---------------|-------------------------------|---------------|
| <b>P1-TMS</b> | 17.9                          | 1.34          |
| <b>P1</b>     | 12.1                          | 1.50          |
| <b>P2-TMS</b> | 23.8                          | 1.36          |
| <b>P2</b>     | 21.6                          | 1.38          |

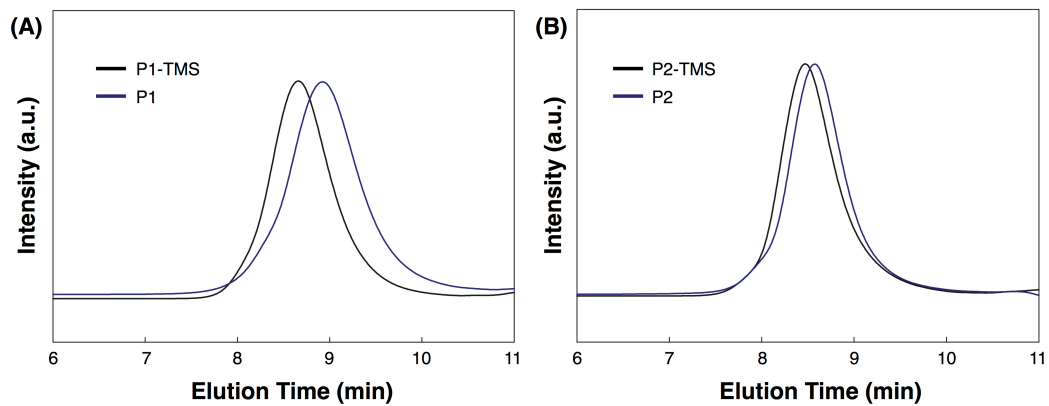

**Figure S2.** GPC spectra of (A) **P1-TMS**, **P1** and (B) **P2-TMS**, **P2**.

### 3. Cross-linking of film of P1

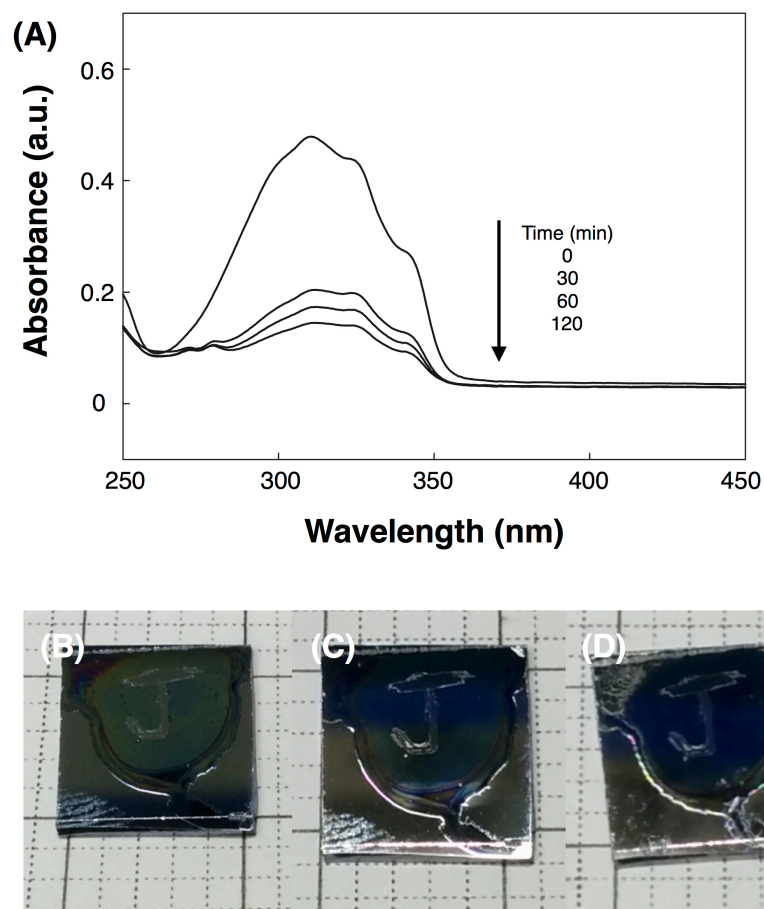

**Figure S3.** (A) UV-Vis spectra of polymer film of **P1** spin-coated onto square quartz plate (2 cm x 2 cm) at irradiation of UV light ( $\lambda > 300$  nm, 200 W) for different exposure time. (B-D) Photographs of polymer film of **P1** spin-coated onto silicon wafer (1 cm x 1 cm) with scratch. (B) Polymer film of **P1** before and (C) after 2 h of UV light irradiation. (D) Cross-linked polymer film of **P1** after soaking in THF for 1 h.



4. Short-wavelength UV light ( $\lambda = 254$  nm) exposure to cross-linked **P1** solution & demonstration of [2 + 2]-cycloaddition and retro-cyclization of indenylstyrene model compound

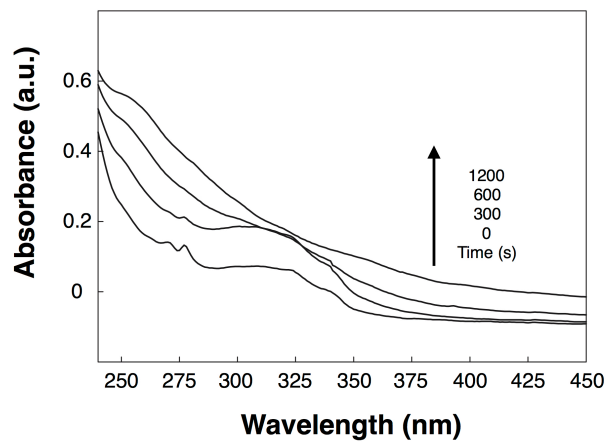

**Figure S4.** UV-Vis spectra of cross-linked **P1** in  $\text{CH}_2\text{Cl}_2$  at short-wavelength UV light ( $\lambda = 254$  nm, 6 W) irradiation for different exposure times.

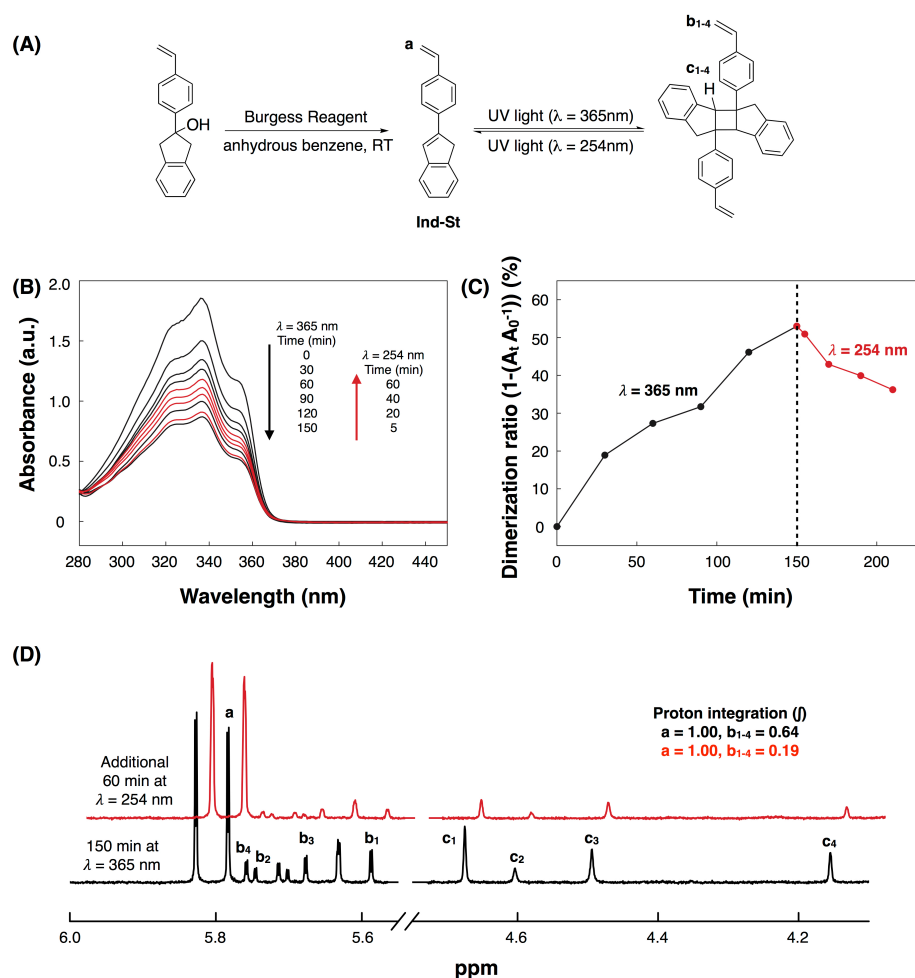

**Figure S5.** (A) Schematic procedures for preparation of a model compound 4-indenylstyrene (**Ind-St**) and its [2 + 2]-cycloaddition at long-wavelength UV light ( $\lambda = 365\text{nm}$ ) and retro-cyclization of indene dimers at short-wavelength UV light ( $\lambda = 254\text{ nm}$ ). (B) UV-Vis spectra of **Ind-St** in benzene ( $1\text{ mg mL}^{-1}$ ) with irradiation of long-wavelength UV light (black) and short-wavelength UV light (red), sequentially, for different exposure times. (C) Plot of the UV exposure time against the dimerization ratio ( $1 - (A_t/A_0)^{-1}$ ), where  $A_0$  and  $A_t$  are the absorbance values at  $337\text{ nm}$  at time 0 and  $t$ , respectively. The dimerization ratio at  $t = 150\text{ min}$  was  $53.0\%$  and  $t = 210\text{ min}$  was  $36.2\%$ . (D)  $^1\text{H}$  NMR spectra of **Ind-St** solution after irradiation of long-wavelength UV light (black) and short-wavelength UV light (red), sequentially. “b<sub>1-4</sub>” and “c<sub>1-4</sub>” are caused by 4 different isomers of indene dimers.<sup>1</sup> The dimerization ratio calculated by the proton integration ( $(\int b)/(\int a + \int b)^{-1}$ ) was  $39.0\%$  at  $t = 150\text{ min}$  and was  $16.0\%$  at  $t = 210\text{ min}$ .

## 5. A coincidence of the composition ratio of indenylstyrene in the hydrophobic block and stability of the self-assembled structures

**Table S2.** Characterization of additional polymers containing indene species

| Sample     | Initiator             | $DP_n$ (St) <sup>a</sup> | $DP_n$ (Ind-St) <sup>a</sup> | $f_{\text{Ind}}$ (%) <sup>a</sup> | $f_{\text{PEG}}$ (%) <sup>b</sup> | $M_n$ (kg mol <sup>-1</sup> )<br><sup>1</sup> H NMR <sup>a</sup> | $M_n$ (kg mol <sup>-1</sup> )<br>GPC <sup>c</sup> | $\bar{D}$<br>GPC |
|------------|-----------------------|--------------------------|------------------------------|-----------------------------------|-----------------------------------|------------------------------------------------------------------|---------------------------------------------------|------------------|
| <b>P1S</b> | (PEG550) <sub>3</sub> | 169                      | 10                           | 5.6                               | 8.1                               | 22.0                                                             | 25.0 <sup>e</sup>                                 | 1.12             |
| <b>P2S</b> | (PEG550) <sub>3</sub> | 175                      | 21                           | 10.7                              | 7.2                               | 24.6                                                             | 21.7 <sup>e</sup>                                 | 1.09             |
| <b>P3S</b> | (PEG550) <sub>3</sub> | 126                      | 33                           | 20.7                              | 7.7                               | 23.0                                                             | 20.5                                              | 1.08             |

<sup>a</sup>Degree of polymerization ( $DP_n$ ), indenylstyrene ratio of hydrophobic block ( $f_{\text{Ind}}$ ) and  $M_n$  were calculated from <sup>1</sup>H NMR integration of deprotected polymers (**P-OH**). <sup>b</sup>The molecular weight ratio of the PEG domain ( $f_{\text{PEG}}$ ) to that of the hydrophobic block (1650 g mol<sup>-1</sup> for (PEG550)<sub>3</sub> initiator). <sup>c</sup>GPC data were measured from deprotected polymers (**P-OH**).

**Table S3.** DLS count rates of cross-linked polymer vesicles with various indenylstyrene ratio

| Sample     | $f_{\text{Ind}}$ (%) | Count rate ( $\times 10^3$ Kcps) <sup>a</sup> |                | Relative count rate<br>THF/Water (%) |
|------------|----------------------|-----------------------------------------------|----------------|--------------------------------------|
|            |                      | diluted in water                              | diluted in THF |                                      |
| <b>P1S</b> | 5.6                  | 106.6                                         | 2.8            | 2.6                                  |
| <b>P2S</b> | 10.7                 | 134.2                                         | 14.7           | 11.0                                 |
| <b>P3S</b> | 20.7                 | 80.2                                          | 29.9           | 37.3                                 |
| <b>P6</b>  | 36.3                 | 49.0                                          | 44.8           | 91.4                                 |
| <b>P5</b>  | 56.4                 | 50.0                                          | 46.2           | 92.4                                 |

<sup>a</sup>Same amount of cross-linked vesicles were diluted in water and THF respectively.

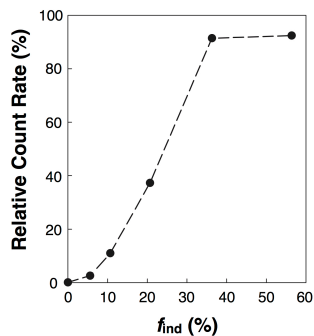

**Figure S6.** Plot of  $f_{ind}$  vs. relative count rate. Critical content of indenylstyrene in the hydrophobic block for decent cross-linking was around 30%.

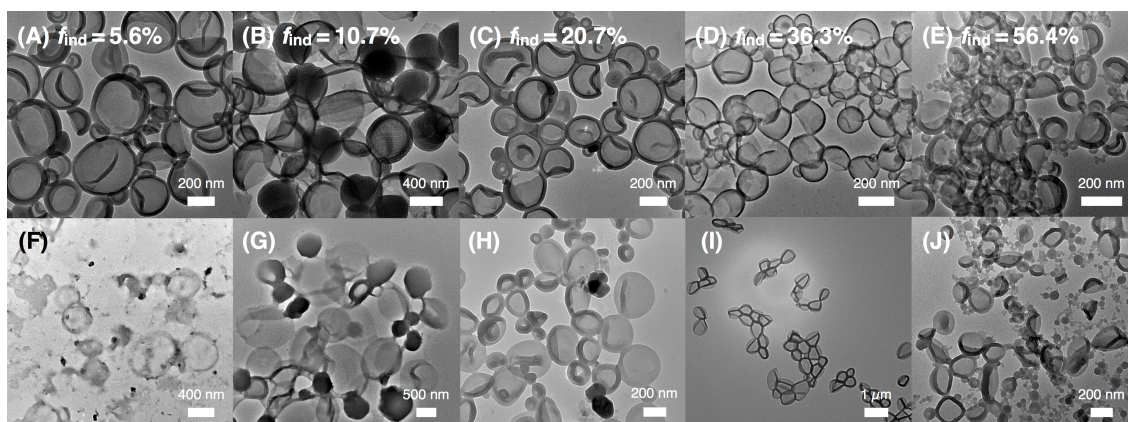

**Figure S7.** (A-E) TEM images of non-cross-linked vesicles of (A) **P1S** ( $f_{ind} = 5.6\%$ ), (B) **P2S** ( $f_{ind} = 10.7\%$ ), (C) **P3S** ( $f_{ind} = 20.7\%$ ), (D) **P6** ( $f_{ind} = 35.3\%$ ) and (E) **P5** ( $f_{ind} = 56.4\%$ ). (F-J) TEM images of cross-linked vesicles of (F) **P1S**, (G) **P2S**, (H) **P3S**, (I) **P6** and (J) **P5** after changing the dispersion solvent to THF.

## 6. Short-wavelength UV light ( $\lambda = 254$ nm) exposure to cross-linked vesicles of P4

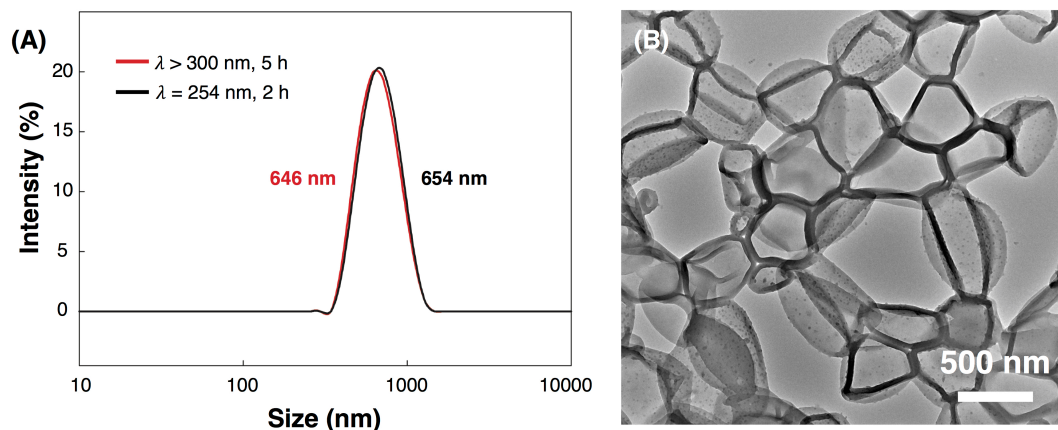

**Figure S8.** (A) Dynamic light scattering size plots of the self-assembled structures of **P4** exposed to long-wavelength UV light ( $\lambda > 300$  nm, 5 h) in a tetrahydrofuran (THF) solution (red) and sequentially exposed to short-wavelength UV light ( $\lambda = 254$  nm, 2 h) in a THF solution (black). (B) TEM image of vesicles of **P4** exposed to short-wavelength UV light after changing the dispersion solvent to THF.

## Reference

- (1) Wolff, T.; Schmidt, F.; Volz, P. Regioselectivity and Stereoselectivity in the Photodimerization of Rigid and Semirigid Stilbenes. *J. Org. Chem.* **1992**, *57*, 4255-4262.
